# Supplementary material for: Lung protective properties of the volatile anesthetics
Source: Springer Nature journal article supplement (doi:10.1007/s00134-016-4429-x), 2016-07-04
Supplement: MOESM1 [file 10332918]

**Current and Potential Investigations into the Potential Lung Protective Properties of Volatile Anesthetics:**

Ongoing or recently completed studies (from clinicaltrials.gov):

*Effects of SEvoflurane on Gas Exchange and Inflammation in Patient With ARDS (SEGA) study – University Hospital Clermont Ferrand, France*

The SEGA study is a prospective, randomized controlled trial of the effects of 48 hours of inhaled sedation with sevoflurane with patients with moderate to severe ARDS. The control group received midazolam sedation, and patients in both groups were paralyzed with cisatracurium. Outcome measures included indices of oxygenation and plasma and alveolar markers of inflammation.

*Anesthetic Methods and Liver Transplantation – Taiwan University Hospital*

Prospective, randomized trial investigating the potential effect of inhaled anesthetics versus propofol on the limitation of pulmonary leukocyte infiltration after hepatic ischemia-reperfusion injury seen during liver transplantation. Outcomes include a lung injury score and p:f ratio.

*The Clinic Trial On Protection of Xenon Anaesthesia Against Perioperative Lung Injury for Standford A Acute Aortic Dissection – Beijing Anzhen Hospital*

Prospective, randomized double blind clinical trial investigating the potential ability of static inflation of xenon anesthesia during cardiopulmonary bypass to prevent lung injury for patients undergoing open thoracic aortic dissection repair. Outcomes include Murray’s acute lung injury score, extubation time, ICU length of stay, and exhaled breath condensate of multiple inflammatory mediators.

Areas of Potential Investigation:

- Use of inhaled sedation in ICU patients as preventative therapy for patients at risk for ARDS and impact on clinical outcomes
- Use of inhaled sedation in ICU patients as therapy for patients with known ARDS and impact on clinical outcomes
- Experimentation with use of different inhaled agents at various doses to determine most effective agent and dose
- Inhaled anesthetics versus total intravenous anesthetics for major cardiac or thoracic surgery and impact on pulmonary inflammation and clinical outcomes
- Inhaled versus total intravenous anesthetics for patients with thoracic trauma presenting to the operating room and impact on clinical outcomes
- Use of inhaled anesthetics as rescue therapy for patients suffering from severe ARDS
