# Supplementary material for: Lung protective properties of the volatile anesthetics
Source: Springer Nature journal article supplement (doi:10.1007/s00134-016-4429-x), 2016-07-04
Supplement: MOESM2 [file 10332918]

| **Author** | **Year** | **Exposure** | **Model** | **Intervention** | **Outcome** |
| --- | --- | --- | --- | --- | --- |
| Watanabe | 2013 | LIRI | In vitro | Sevoflurane | Reduced TNFa, IL6, IL8, MCP1, inhibited nuclear translocation of NFKb |
| Chung | 2013 | LPS | Murine | Isoflurane | Reduced histologic inflammation, BAL TNFa, IL1B, IL5. Increased ROS generation, inhibition of ROS burst |
| Ferrando | 2013 | ARDS | Porcine | Sevoflurane vs propofol | Reduced BAL IL1b, TNFa, IL6, PMN cell count |
| Englert | 2015 | LPS/VILI | Murine | Isoflurane | Reduced edema/inlammatory infiltrates, less BAL protein, preservation of TJ |
|  |  |  |  |  |  |
| Schilling | 2007 | OLV | Human | Desflurane vs propofol | Reduced BAL PMN count, TNFa, IL8, IL10 |
| Sugasawa | 2012 | OLV | Human | Sevoflurane vs propofol | Reduced BAL IL1b, Il6, IL8 |
| Beck | 2001 | OLV | Human | Sevoflurane vs propofol | No difference in shunt fraction, hemodynamics, or oxygenation |
| DeConno | 2009 | OLV | Human | Sevoflurane vs propofol | Reduced BAL IL6, IL8, MCP1, TNFa and composite adverse events |
| Uhlig | 2016 | OR anesthesia | Human | Inhaled vs TIVA | Reduced overall mortality, fewer pulmonary complications |
| Bellgardt | 2016 | ICU sedation | Human | Inhaled vs IV sedation | Reduced 1 year and in-hospital mortality, increased ventilator free days |
| Allouchiche | 2001 | VILI | Porcine | Sevoflurane/desflurane vs propofol | Increased oxidative stress w desflurane |
| Strosing | 2016 | VILI | Murine | Sevoflurane vs isoflurane vs desflurane | Reduced VILI for sevoflurane and isoflurane, desflurane mice similar levels of injury as controls |
| Schilling | 2011 | OLV | Human | Sevoflurane vs desflurane vs propofol | Reduced BAL TNFa, IL8, IL1B for both sevoflurane and desflurane |

Table 1: Investigations suggesting a lung protective effect of volatile anesthetics. Listed and grouped by order of reference within the text. LIRI = Lung ischemia reperfusion injury, LPS = Lipopolysaccharide, ARDS = Acute Respiratory Distress Syndrome, VILI = Ventilator induced lung injury, OLV = One lung ventilation, OR = Operating Room, ICU = Intensive Care Unit, TIVA = Total intravenous anesthesia, IV = intravenous, TNFa = Tumor necrosis factor alpha, IL = Interleukin, MCP = Monocyte chemoattractant protein, NFKb = Nuclear factor kappa beta, BAL = Bronchoalveolar lavage, ROS = Reactive oxygen species, PMN = Polymorphonuclear, TJ = Tight junction.
